# Supplementary material for: New Trend in Toxicological Screening Using Volumetric Absorptive Microsampling (VAMS) and High-Resolution Mass Spectrometry (HR/MS) Combination
Source: MDPI journal article supplement (doi:10.3390/molecules28083466), 2023-04-14
Supplement: s1 [file s1]

## **Supplementary Materials**

### **New Trend in Toxicological Screening Using Volumetric Absorptive Microsampling (VAMS) and High-Resolution Mass Spectrometry (HR/MS) Combination**

Pascal Houzé<sup>1,2\*</sup>, Ilona Borowski<sup>1</sup>, Eugénie Bito<sup>1</sup>, Romain Magny<sup>1,3</sup>, Athina Morcos<sup>1</sup>, Sebastian Voicu<sup>3,4</sup>, Bruno Mégarbarne<sup>3,4</sup> and Laurence Labat<sup>1,4</sup>

<sup>1</sup>Laboratory of Toxicology, Federation of Toxicology, Lariboisière Hospital, Assistance Publique-Hôpitaux de Paris (AP-HP), 10 rue Ambroise Paré, 75010 Paris, France

<sup>2</sup>Chemical and Biological Health Technologies Unit (UTCBS), CNRS UMR8258-U1022, University of Paris, 4 Avenue de l'Observatoire, 75006 Paris, France

<sup>3</sup>INSERM UMRS-1144, University of Paris, 4 Avenue de l'Observatoire, 75006 Paris, France

<sup>4</sup>Department of Medical and Toxicological Critical Care, Federation of Toxicology, Lariboisière Hospital, Assistance Publique-Hôpitaux de Paris (AP-HP), 10 rue Ambroise Paré, 75010 Paris, France

\*Correspondence: [pascal.houze@aphp.fr](mailto:pascal.houze@aphp.fr); Tel.: +33-1-44-49-65-86

**Supplementary Table S1:** List, in alphabetical order, of the 90 compounds, parent molecules and metabolites, with log P values, included in this study. 6-MAM : 6-monoacetylmorphine; 11-hydroxy-THC: 11-hydroxy- $\Delta^9$ -tetrahydrocannabinol; LSD: lysergic acid diethylamide; MBDB: N-methyl-1-(1,3-benzodioxol-5-yl)-2-aminobutane; MDA: 3,4-méthylènedioxyamphétamine ; MDEA: 3,4-méthylènedioxy-N-éthylamphétamine ; MDMA: 3,4-méthylènedioxy-N-méthylamphétamine; MDPV: Méthylènedioxyprovalérone; THC : tetrahydrocannabinol; THC-COOH : 11-carboxy-tetrahydrocannabinol. \* log P values were obtained from Drugs Bank data base

| Number | Name                   | log P value* | Number | Name                    | log P value* |
|--------|------------------------|--------------|--------|-------------------------|--------------|
| 1      | 3-chloromethcathinone  | 1.86         | 46     | MBDB                    | 2.15         |
| 2      | 4- methylmethcathinone | 2.39         | 47     | MDA                     | 1.56         |
| 3      | 6-MAM                  | 1.31         | 48     | MDEA                    | - 0.72       |
| 4      | 7-amino-clonazepam     | 2.38         | 49     | MDMA                    | 2.15         |
| 5      | 11-hydroxy-THC         | 5.33         | 50     | MDPV                    | 3.97         |
| 6      | acebutolol             | 1.71         | 51     | metamphetamine          | 2.07         |
| 7      | acetylcodeine          | 2.00         | 52     | methadone               | 3.93         |
| 8      | alimemazine            | 4.71         | 53     | methylester ecgonine    | 0.14         |
| 9      | alprazolam             | 2.12         | 54     | methy lone              | 1.91         |
| 10     | amphetamine            | 1.76         | 55     | methy lphen idate       | 0.2          |
| 11     | aripiprazole           | 5.3          | 56     | midazolam               | 4.33         |
| 12     | baclofen               | 1.3          | 57     | morphine                | 0.87         |
| 13     | benzoylecgonine        | - 0.59       | 58     | N-acetyldiltiazem       | 2.73         |
| 14     | bromazepam             | 2.05         | 59     | N-desmethy ltramadol    | 2.07         |
| 15     | buprenorphine          | 4.98         | 60     | N-desmethy lvenlafaxine | 2.36         |
| 16     | clonazepam             | 2.41         | 61     | n itrazepam             | 2.25         |
| 17     | clozapine              | 3.23         | 62     | norbenzoylecgonine      | - 0.8        |
| 18     | cocaethylene           | 2.64         | 63     | norbuprenorphine        | 2.3          |
| 19     | cocaine                | 2.30         | 64     | norcodeine              | 0.96         |
| 20     | codeine                | 1.39         | 65     | nordazepam              | 3.21         |
| 21     | cyamemazine            | 4.27         | 66     | norfentanyl             | 1.42         |
| 22     | dehydroaripiprazole    | 4.98         | 67     | norflouxetine           | 3.74         |
| 23     | desmethy lclozapine    | 3.02         | 68     | noroxycodone            | 0.65         |
| 24     | desmethy lzopiclone    | - 0.09       | 69     | O-desmethy ltramadol    | 1.72         |
| 25     | dextromethorphan       | 3.97         | 70     | O-desmethy lvenlafaxine | 2.72         |
| 26     | diazepam               | 2.82         | 71     | oxazepam                | 2.24         |
| 27     | dihydrocodeine         | 0.8          | 72     | oxycodone               | 0.7          |
| 28     | diltiazem              | 2.7          | 73     | phenacetin              | 1.58         |
| 29     | diphenhydramine        | 3.27         | 74     | phenobarbital           | 1.47         |
| 30     | ecgonine               | - 1.8        | 75     | pregabalin              | 1.78         |
| 31     | ethylglucuronide       | - 1.6        | 76     | propanolol              | 3.48         |
| 32     | fentanyl               | 4.05         | 77     | propofol                | 3.79         |
| 33     | fluoxetine             | 4.05         | 78     | secobarbital            | 1.97         |
| 34     | furosemide             | 2.03         | 79     | sufentanil              | 3.95         |
| 35     | gabapentin             | 1.25         | 80     | temazepam               | 2.19         |
| 36     | haloperidol            | 4.3          | 81     | tetrazepam              | 3.20         |
| 37     | hydrochlorothiazide    | - 0.07       | 82     | THC                     | 5.65         |
| 38     | hydromorphone          | 1.06         | 83     | THC-COOH                | 5.14         |
| 39     | irbesartan             | 4.5          | 84     | tramadol                | 1.34         |
| 40     | ketamine               | 3.12         | 85     | triazolam               | 2.42         |
| 41     | lamotrigine            | 1.93         | 86     | tropatepine             | 4.82         |
| 42     | levamisole             | 2.3          | 87     | valsartan               | 1.50         |
| 43     | lorazepam              | 3.35         | 88     | zaleplon                | 0.9          |
| 44     | lormetazepam           | 3.39         | 89     | zolpidem                | 3.02         |
| 45     | LSD                    | 2.95         | 90     | zopiclone               | 0.8          |
